# Supplementary material for: Machine Learning in the Classification of Pediatric Posterior Fossa Tumors: A Systematic Review
Source: MDPI journal article supplement (doi:10.3390/cancers14225608), 2022-11-15
Supplement: s1 [file s1]

## Supplementary Materials:

| Study                                                                                                            | AUC       | Accuracy   | Sensitivity | Specificity |
|------------------------------------------------------------------------------------------------------------------|-----------|------------|-------------|-------------|
| <b>Discrimination of AS vs. EP vs. PNET</b>                                                                      |           |            |             |             |
| Arle et al. 1997[16]                                                                                             | -         | 58.5-94.6  | -           | -           |
| <b>Discrimination of AS vs. chordoma vs. CPP vs. DMG vs. EP vs. ET vs. germinoma vs. GG vs. HB vs. MB vs. PA</b> |           |            |             |             |
| Hollon et al. 2018[39]                                                                                           | 0.96-0.97 | 89.4-100.0 | 86.5-90.3   | 92.3-95.7   |
| <b>Discrimination of AS vs. EP vs. GG vs. MB vs. ODG vs. other glioma</b>                                        |           |            |             |             |
| Leslie et al. 2012[40]                                                                                           | -         | 95.9       | -           | -           |
| <b>Discrimination of EP vs. DMG vs. MB vs. PA</b>                                                                |           |            |             |             |
| Quon et al. 2020[31]                                                                                             | -         | 92.0       | -           | -           |
| <b>Discrimination of ATRT vs. MB</b>                                                                             |           |            |             |             |
| Zhang et al. 2021[34]                                                                                            | 0.73-0.86 | 81.0-83.0  | 80.0        | 82.0-91.0   |
| <b>Discrimination of DIPG vs. EP vs. ETMR vs. GBM vs. MB vs. PA</b>                                              |           |            |             |             |
| Danielsson et al. 2015[38]                                                                                       | -         | 98.3       | -           | -           |

**Supplementary Table S1:** Summary of performance metrics for machine learning algorithms that discriminate between both common and rare posterior fossa tumors.

AS, astrocytoma; ATRT, atypical teratoid rhabdoid tumor; AUC, area under the curve; CPP choroid plexus papilloma; DMG, diffuse midline glioma; EP, ependymoma; ET, embryonal tumor; ETMR, embryonal tumors with multilayered rosettes; GBM, glioblastoma multiforme; GG, ganglioglioma; HB, hemangioblastoma; MB, medulloblastoma; ODG, oligodendroglioma; PA, pilocytic astrocytoma.

### Searches

*Pubmed [7/31/2022, 106 results]*

((machine learning) OR (artificial intelligence)) AND ((glioma) OR (hemangioblastoma) OR (dermoid) OR (gangliocytoma) OR (rhabdoid) OR (teratoid) OR (posterior fossa) OR (ependymoma) OR (medulloblastoma) OR (pilocytic astrocytoma)) AND (pediatric))

*Web of Science [7/31/2022, 44 results]*

((machine learning) OR (artificial intelligence)) AND ((glioma) OR (hemangioblastoma) OR (dermoid) OR (gangliocytomas) OR (rhabdoid) OR (teratoid) OR (posterior fossa) OR (ependymoma) OR (medulloblastoma) OR (pilocytic astrocytoma)) AND (pediatric))

*EMBASE [7/31/2022, 282 results]*

('machine learning'/exp OR 'machine learning' OR (('machine'/exp OR machine) AND ('learning'/exp OR learning)) OR 'artificial intelligence'/exp OR 'artificial intelligence' OR (artificial AND ('intelligence'/exp OR intelligence))) AND ('glioma'/exp OR glioma OR 'hemangioblastoma'/exp OR hemangioblastoma OR

*'dermoid'/exp OR dermoid OR 'gangliocytoma'/exp OR gangliocytoma OR rhabdoid OR teratoid OR 'posterior fossa'/exp OR 'posterior fossa' OR (posterior AND fossa) OR 'ependymoma'/exp OR ependymoma OR 'medulloblastoma'/exp OR medulloblastoma OR 'pilocytic astrocytoma'/exp OR 'pilocytic astrocytoma' OR (pilocytic AND ('astrocytoma'/exp OR astrocytoma))) AND ('pediatric'/exp OR pediatric)*
